# Supplementary material for: Self-Reported Mental and Physical Measures in Adult Fontan Patients
Source: MDPI journal article supplement (doi:10.3390/jcm11143969), 2022-07-08
Supplement: s1 [file s1]

Table S1. PROMIS global short form (V1.2)

|                           |                                                                                                                                                                                                                                  |                                          |           |            |          |             |
|---------------------------|----------------------------------------------------------------------------------------------------------------------------------------------------------------------------------------------------------------------------------|------------------------------------------|-----------|------------|----------|-------------|
|                           |                                                                                                                                                                                                                                  | Excellent                                | Very good | Good       | Fair     | Poor        |
| 1                         | In general, would you say your health is....                                                                                                                                                                                     |                                          |           |            |          |             |
| 2                         | In general, would you say your quality of health is....                                                                                                                                                                          |                                          |           |            |          |             |
| 3                         | In general, how would you rate your physical health?                                                                                                                                                                             |                                          |           |            |          |             |
| 4                         | In general, how would you rate your mental health?                                                                                                                                                                               |                                          |           |            |          |             |
| 5                         | In general, how would you rate your satisfaction with your social activities and relationships?                                                                                                                                  |                                          |           |            |          |             |
| 6                         | In general, please rate how well you carry out your usual social activities and roles. (This includes activities at home, at work, and in your community, and responsibilities as a parent, child, spouse, employee, friend etc) |                                          |           |            |          |             |
|                           |                                                                                                                                                                                                                                  | Completely                               | Mostly    | Moderately | A little | Not at all  |
| 7                         | To what extent are you able to carry out your everyday physical activities such as walking, climbing stairs, carrying groceries, or moving a chair?                                                                              |                                          |           |            |          |             |
| <b>In the past 7 days</b> |                                                                                                                                                                                                                                  |                                          |           |            |          |             |
|                           |                                                                                                                                                                                                                                  | Never                                    | Rarely    | Sometimes  | Often    | Always      |
| 8                         | How often have you been bothered by emotional problems such as feeling anxious, depressed, or irritable?                                                                                                                         |                                          |           |            |          |             |
|                           |                                                                                                                                                                                                                                  | None                                     | Mild      | Moderate   | Severe   | Very severe |
| 9                         | How would you rate your fatigue on average?                                                                                                                                                                                      |                                          |           |            |          |             |
| 10                        | How would you rate your pain on average?                                                                                                                                                                                         | 0=No Pain-----→10= worst imaginable pain |           |            |          |             |
